# Supplementary material for: Interplay between an ATP-binding cassette F protein and the ribosome from Mycobacterium tuberculosis
Source: PubMed Central journal article supplement (PMC8782954; doi:10.1038/s41467-022-28078-1), 2022-01-21
Supplement: 41467_2022_28078_MOESM3_ESM.pdf [file 41467_2022_28078_MOESM3_ESM.pdf]

### **Description of Additional Supplementary Files**

File Name: Supplementary Movie 1

Description: Morphing between the two structures of 70SIC-MtbEttA complex in the pre-hydrolysis states.

File Name: Supplementary Movie 2

Description: Asymmetric nucleotide-engagement in the two nucleotide-binding sites of MtbEttA in the pre-hydrolysis states.

File Name: Supplementary Movie 3

Description: Morphing between the structures of MtbEttA in the Trans\_R0 and post-hydrolysis states.
